# Supplementary material
Source: MDPI journal article supplement (https://www.mdpi.com/2311-5637/8/5/229)
Supplement: s1 [file s1]

## Supplementary materials

### Cofactor Self-Sufficient Whole-Cell Biocatalysts for the Relay-Race Synthesis of Shikimic Acid

Xiaoshuang Wang<sup>1,2,3,†</sup>, Fengli Wu<sup>2,3,†,\*</sup>, Dan Zhou<sup>2,3,4</sup>, Guotian Song<sup>2,3</sup>, Wujiu Chen<sup>2,3</sup>,  
Cuiying Zhang<sup>1</sup> and Qinhong Wang<sup>2,3,\*</sup>

<sup>1</sup> College of Biotechnology, Tianjin University of Science & Technology, Tianjin 300457, China

<sup>2</sup> CAS Key Laboratory of Systems Microbial Biotechnology, Tianjin Institute of Industrial Biotechnology, Chinese Academy of Sciences, Tianjin 300308, China

<sup>3</sup> National Center of Technology Innovation for Synthetic Biology, Tianjin 300308, China

<sup>4</sup> College of Bioengineering, Chongqing University, Chongqing 400044, China

\* Correspondence: wu\_fl@tib.cas.cn, wang\_qh@tib.cas.cn

† These authors contributed equally to this work.

Mailing address: Tianjin Institute of Industrial Biotechnology, Chinese Academy of Sciences, 32 XiQiDao, Tianjin Airport Economic Area, Tianjin 300308, P. R. China

Phone: +86-022-84861950

## Supplementary Materials and Methods

### *DHS fermentative broth preparation*

For preparation of DHS fermentative broth, fed-batch fermentation was conducted in a 5-L bioreactor (BIOTECH-5BG, Bxbio, China). A single colony was inoculated into a falcon tube containing 5 mL LB medium and cultured overnight at 37 °C. The overnight seed was then inoculated into a 1 L shake flask containing 200 mL LB medium at a ratio of 1:100 and incubated at 37 °C, 250 rpm for 10-12 h. After this, the seed culture was transferred into 1.8 L of fermentation medium at a 1:10 (v/v) inoculum: medium ratio and incubated at 37 °C. The fermentation medium contained 7.5 g/L  $\text{K}_2\text{HPO}_4 \cdot 3\text{H}_2\text{O}$ , 2 g/L  $\text{MgSO}_4 \cdot 7\text{H}_2\text{O}$ , 1.6 g/L  $(\text{NH}_4)_2\text{SO}_4$ , 2 g/L citric acid monohydrate, 0.075 g/L  $\text{FeSO}_4 \cdot 7\text{H}_2\text{O}$ , 4.5 mg/L  $\text{MnSO}_4 \cdot \text{H}_2\text{O}$ , 20 mg/L  $\text{Na}_2\text{SO}_4$ , 6.4 mg/L  $\text{ZnSO}_4 \cdot 7\text{H}_2\text{O}$ , 4 mg/L  $\text{CoCl}_2 \cdot 6\text{H}_2\text{O}$ , 0.6 mg/L  $\text{CuSO}_4 \cdot 5\text{H}_2\text{O}$ . The agitation, air supplementation and feed rate were changed to maintain the dissolved oxygen (DO) concentration above 30% saturation. The pH was maintained at 6.8 using 25% (w/v)  $\text{NH}_3 \cdot \text{H}_2\text{O}$ . The DO-stat feeding strategy was employed to supply 60% (w/w) glucose to the fermenter. Samples were collected every 2 h to determine cell density ( $\text{OD}_{600}$ ), residual glucose and DHS titer.

### *SDS-PAGE analysis of protein expression*

SDS-PAGE was carried out to analyze the expression of different GDHs and AroE. For protein preparation, the *E. coli* BL21(DE3) cells were harvested by centrifugation at 5,000 g for 5 min at 4 °C. Cell pellets were washed once with 15 mL PBS buffer and resuspended in 10 mL of the same buffer. The suspensions were sonicated for 10 min

(300 W, pulse 2 s, interval 3 s) with an ultrasonic homogenizer (SCIENTZ-II D, Ningbo Scientz Biotechnology, China) in an ice water bath, and then centrifuged at 8,000 g for 10 min at 4 °C. After the cell precipitations were washed twice with PBS buffer, the supernatants and cell precipitations along with whole-cell lysates were analyzed by electrophoresis on an 12% (w/v) SDS-PAGE gel. The gels were stained with Coomassie blue R-250 solution.

## Supplementary Figures

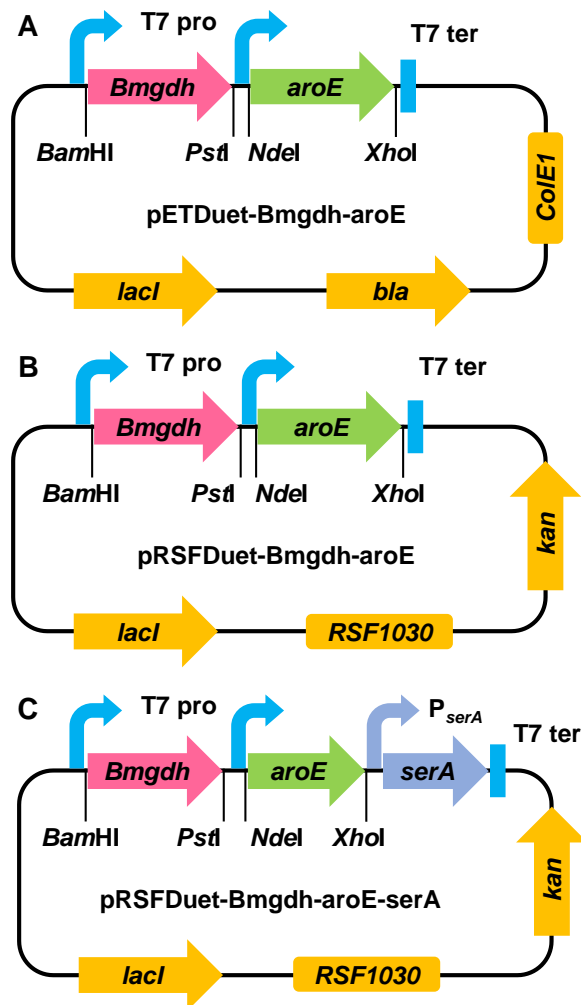

**Figure S1.** Simple diagrams of the plasmids for pETDuet-Bmgdh-aroE (**A**), pRSFDuet-Bmgdh-aroE (**B**) and pRSFDuet-aroE-Bmgdh-serA (**C**). If the *Bmgdh* in pETDuet-Bmgdh-aroE was replaced with *gdh* from other organisms, such as *Tagdh*, *Lsgdh*, *Bsgdh* or *Bagdh*, the corresponding plasmid can be obtained.

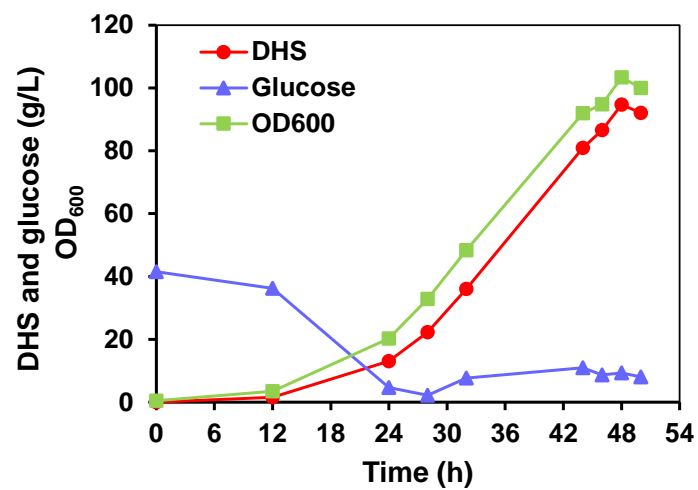

**Figure S2.** Fed-batch fermentation of DHS overproducing strain WJ060. Cell density (OD<sub>600</sub>), DHS production and residual glucose concentration were measured during a fermentation period of 50 h.

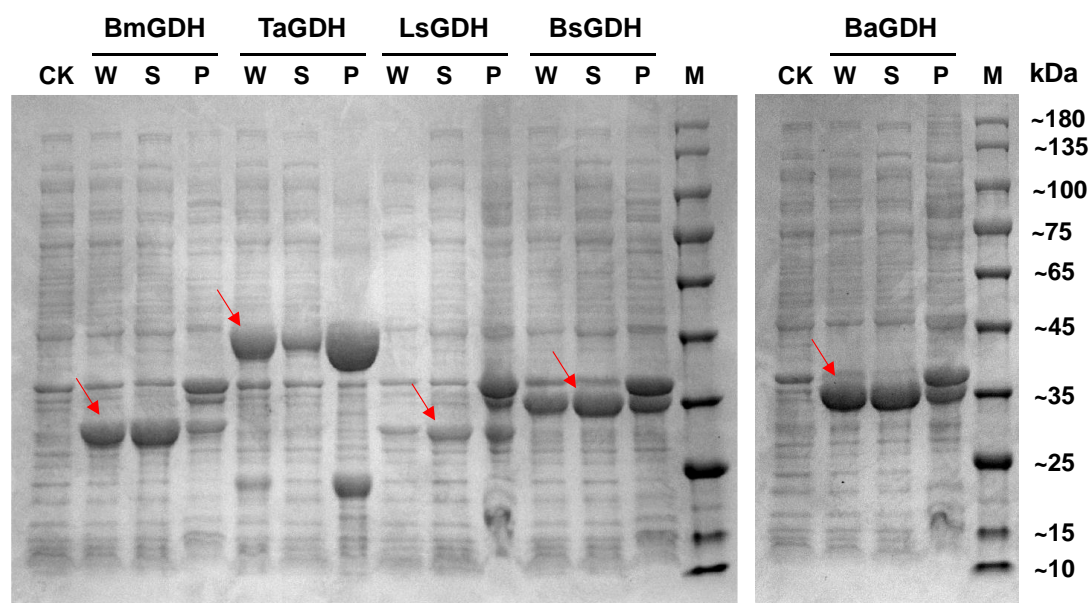

**Figure S3.** SDS-PAGE analysis of different GDH proteins. BL21(DE3) strain transformed with empty pETDuet-1 plasmid was used as the negative control (CK). Same volume (6  $\mu$ L) of supernatant or cell precipitation was loaded on each lane. The GDH bands were labeled with red arrows. Note: W, whole-cell lysate; S, supernatant; P, precipitation; M, protein marker.

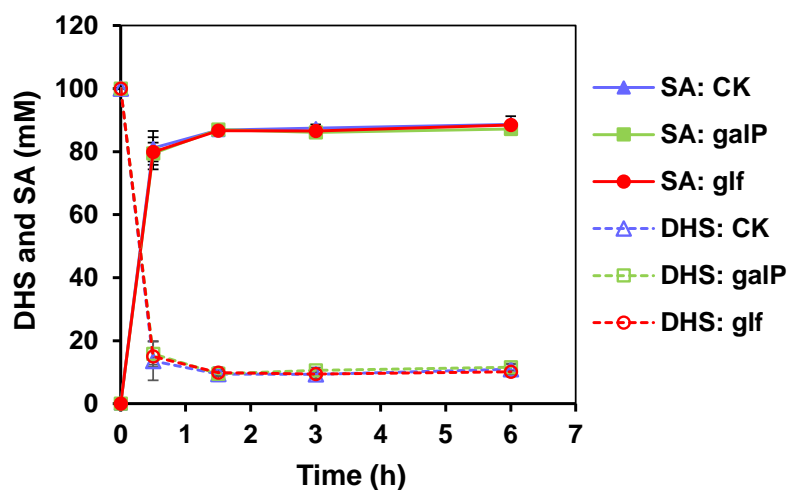

**Figure S4.** Effects of galactose permease GalP or glucose facilitator Glf on the catalytic efficiencies of whole-cell biocatalysts. PET strain transformed with empty pACYCDuet-1 plasmid was used as the negative control (CK). Reaction conditions: 100 mM sodium phosphate buffer (pH 7.0), 100 mM DHS, 150 mM glucose, 5 OD<sub>600</sub> whole-cells, 10 mL of total volume, 37 °C. Data are presented as the mean  $\pm$  standard deviation of three independent experiments.

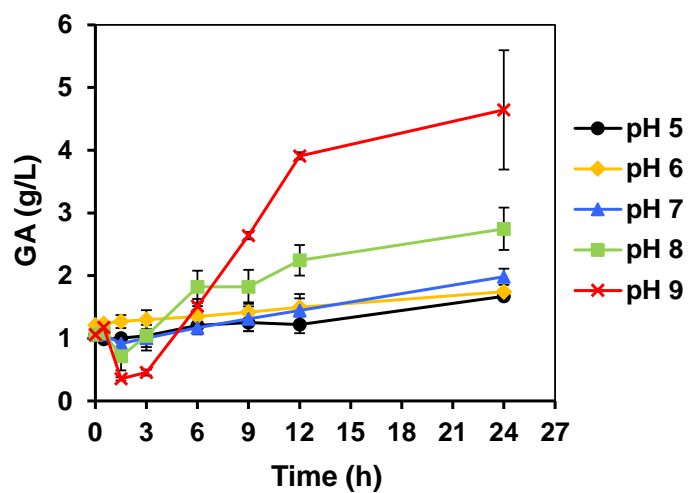

**Figure S5.** The effect of pH on bioconversion of DHS to GA by PET whole-cell biocatalyst. Reaction conditions: 100 mM sodium phosphate buffer (pH 5.0, 6.0, 7.0, 8.0 or 9.0), 100 mM DHS, 150 mM glucose, 2 OD<sub>600</sub> of PET whole-cells, 10 mL of total volume, 37 °C. Data are presented as the mean  $\pm$  standard deviation of three independent experiments.



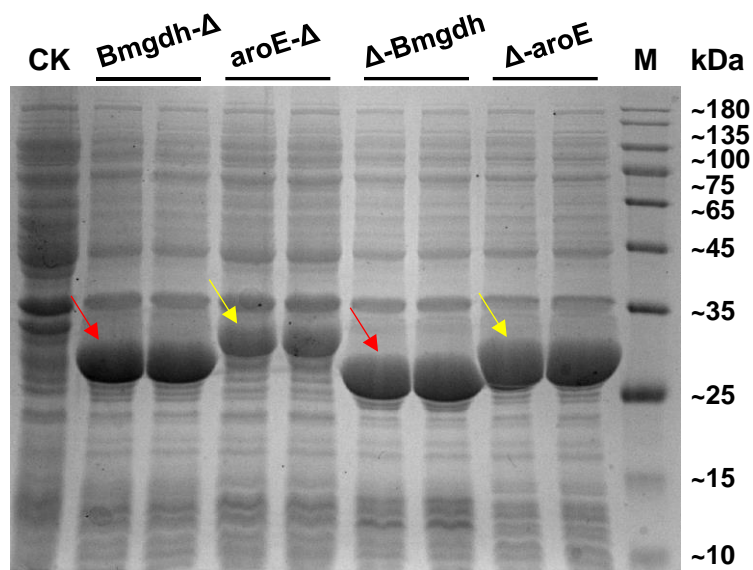

**Figure S6.** SDS-PAGE analysis of BmGDH and AroE proteins. BL21(DE3) strain transformed with empty pRSFDuet-1 plasmid was used as the negative control (CK). Same volume (8  $\mu$ L) of whole-cell lysate was loaded on each lane. The BmGDH and AroE bands were labeled with red and yellow arrows, respectively. Note: M, protein marker.

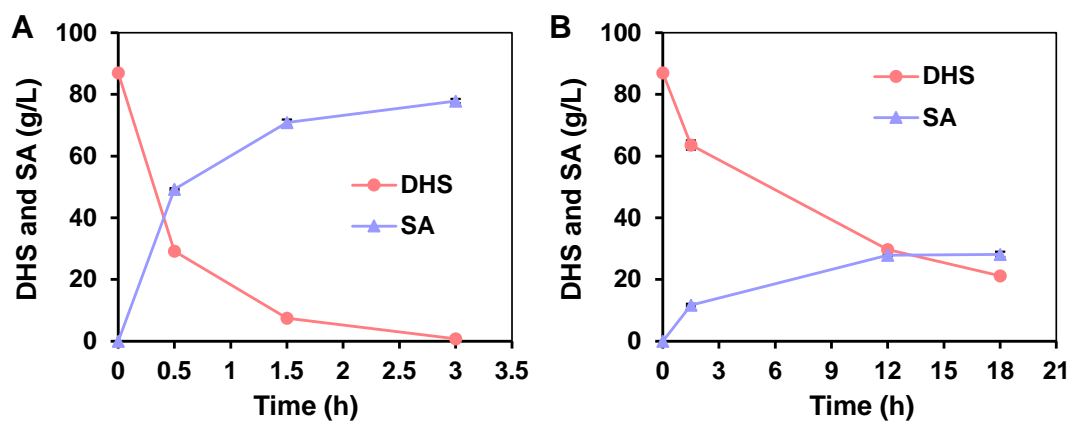

**Figure S7.** Bioconversion of DHS to SA by RSF-serA whole-cell biocatalyst. **(A)** Time courses of DHS and SA titers catalyzed by fresh RSF-serA whole-cell catalyst; **(B)** Time courses of DHS and SA titers catalyzed by reused RSF-serA whole-cell catalyst. Reaction conditions: 87 g/L DHS, 1.4 equivalent of glucose, 20 OD<sub>600</sub> of RSF-serA whole-cells, 1 L of total volume, 34 °C, pH 7.0. Data are presented as the mean  $\pm$  standard deviation of two independent experiments.

## Supplementary Tables

**Table S1.** Comparison of different catalytic methods for the production of SA.

| Methods                               | Enzymes or strains                                     | Catalyst load                                        | Substrates        | Exogenous cofactor | Time (h)       | Titers       | Yields (mol/mol) | Ref.       |
|---------------------------------------|--------------------------------------------------------|------------------------------------------------------|-------------------|--------------------|----------------|--------------|------------------|------------|
| Biocatalysis by two enzymatic systems | Quinate dehydrogenase and 3-dehydroquinate dehydratase | 25 g/L dried cells or 50 g/L dried membrane fraction | 52 mM quinate     | None               | 20             | 40 mM DHS    | 77%              | [16]       |
|                                       | Shikimate dehydrogenase and glucose dehydrogenase      | 1 U/mL and 50 U/mL                                   | 1.4 mM DHS        | NADP <sup>+</sup>  | 1.25           | 1.4 mM SA    | 100%             |            |
| Biocatalysis by Immobilized enzyme    | Quinate dehydrogenase and 3-dehydroquinate dehydratase | 20 g/L dried membrane fraction                       | 50 mM quinate     | None               | 36             | 50 mM DHS    | 100%             | [19]       |
| Enzymatic biocatalysis                | Shikimate dehydrogenase and glucose dehydrogenase      | 0.2 U/mL and 10 U/mL                                 | 20 mM DHS         | NADP <sup>+</sup>  | Data not shown | 20 mM SA     | 100%             |            |
| Whole-cell biocatalysis               | Shikimate dehydrogenase and phosphite dehydrogenase    | 0.17 U/mL and 20 ug/mL                               | 8 mM DHS          | NADP <sup>+</sup>  | 1.5            | 8 mM SA      | 100%             | [21]       |
| Whole-cell biocatalysis               | <i>B. megaterium</i> MTCC 428                          | 200 g/L wet whole cells                              | 5 mM quinate      | None               | 3              | 4.45 mM      | 89%              | [20]       |
| Whole-cell biocatalysis               | Engineered <i>C. glutamicum</i> strain SKM7            | 100 g/L wet whole cells                              | 286.3g/L glucose  | None               | 48             | 141g/L SA    | 51.0%            | [1]        |
| Relay-race synthesis                  | Engineered <i>E. coli</i> strain WJ060                 | 1:10 (v/v) inoculum: medium ratio                    | 60% (w/v) glucose | None               | 48             | 88.6 g/L DHS | 33.0%            | This study |
|                                       | Shikimate dehydrogenase and glucose dehydrogenase      | 20 OD <sub>600</sub> (~30 g/L wet whole cells)       | 88.6 g/L DHS      | None               | 2              | 77.1 g/L SA  | 98.4%            |            |

**Table S2.** The strains and plasmids used in this study.

| Name                              | Characteristics                                                                                                                                                                                                                                             | Source           |
|-----------------------------------|-------------------------------------------------------------------------------------------------------------------------------------------------------------------------------------------------------------------------------------------------------------|------------------|
| <b>Strains</b>                    |                                                                                                                                                                                                                                                             |                  |
| WJ060                             | DSM 1576 P1- <i>aroE</i> <sup>TTG</sup> P2- <i>aroF</i> <sup>fbr</sup> $\Delta$ <i>tyrR</i> P4- <i>tktA</i> $\Delta$ <i>ptsI</i> P1- <i>galP</i> P4- <i>glk</i> P1- <i>pykF</i> <sup>TTG</sup> P1- <i>pykA</i> <sup>TTG</sup> P1- <i>pgi</i> <sup>TTG</sup> | Lab collection   |
| DH5 $\alpha$                      | F- $\phi$ 80 <i>lacZ</i> $\Delta$ M15 $\Delta$ ( <i>lacZYA-argF</i> ) U169 <i>endA1</i> <i>recA1</i> <i>hsdR17</i> (rk <sup>-</sup> , mk <sup>+</sup> ) <i>supE44</i> $\lambda$ <i>thi</i> <sup>-1</sup> <i>gyrA96</i>                                      | TransGen Biotech |
| BL21(DE3)                         | F <sup>-</sup> <i>ompT</i> <i>hsdS<sub>B</sub></i> ( <i>r<sub>B</sub></i> <sup>-</sup> <i>m<sub>B</sub></i> <sup>-</sup> ) <i>gal dcm</i> (DE3)                                                                                                             | Novagen          |
| BL21(DE3) $\Delta$ <i>serA</i>    | BL21(DE3) $\Delta$ <i>serA</i>                                                                                                                                                                                                                              | This study       |
| PET                               | BL21(DE3) pETDuet-Bmgdh- <i>aroE</i>                                                                                                                                                                                                                        | This study       |
| RSF                               | BL21(DE3) pRSFDuet-Bmgdh- <i>aroE</i>                                                                                                                                                                                                                       | This study       |
| RSF- <i>serA</i>                  | BL21(DE3) $\Delta$ <i>serA</i> , pRSFDuet-Bmgdh- <i>aroE-serA</i>                                                                                                                                                                                           | This study       |
| <b>Plasmids</b>                   |                                                                                                                                                                                                                                                             |                  |
| pCas                              | <i>repA101</i> (Ts) <i>kan</i> <i>Pcas-cas9</i> <i>ParaB-Red</i> <i>lacIq</i>                                                                                                                                                                               | [22]             |
| pTargetF                          | <i>P<sub>trc</sub>-sgRNA-pMB1</i>                                                                                                                                                                                                                           |                  |
| pTargetF- <i>serA</i>             | <i>pMB1 aadA sgRNA-cadA</i>                                                                                                                                                                                                                                 | [22]             |
| pETDuet-1                         | <i>pMB1 aadA sgRNA-serA</i>                                                                                                                                                                                                                                 | This study       |
| pRSFDuet-1                        | <i>ColE1 bla lacI</i>                                                                                                                                                                                                                                       | Novagen          |
| pACYCDuet-1                       | <i>RSF1030 kan lacI</i>                                                                                                                                                                                                                                     | Novagen          |
| pETDuet-Bmgdh- $\Delta$           | <i>p15A cat lacI</i>                                                                                                                                                                                                                                        | Novagen          |
| pETDuet-Tagdh- $\Delta$           | <i>ColE1 bla lacI P<sub>T7</sub>-Bmgdh</i>                                                                                                                                                                                                                  | This study       |
| pETDuet-Lsgdh- $\Delta$           | <i>ColE1 bla lacI P<sub>T7</sub>-Tagdh</i>                                                                                                                                                                                                                  | This study       |
| pETDuet-Bsgdh- $\Delta$           | <i>ColE1 bla lacI P<sub>T7</sub>-Lsgdh</i>                                                                                                                                                                                                                  | This study       |
| pETDuet-Bagdh- $\Delta$           | <i>ColE1 bla lacI P<sub>T7</sub>-Bsgdh</i>                                                                                                                                                                                                                  | This study       |
| pETDuet- $\Delta$ - <i>aroE</i>   | <i>ColE1 bla lacI P<sub>T7</sub>-Bagdh</i>                                                                                                                                                                                                                  | This study       |
| pETDuet-Bmgdh- <i>aroE</i>        | <i>ColE1 bla lacI P<sub>T7</sub>-aroE</i>                                                                                                                                                                                                                   | This study       |
| pETDuet-Tagdh- <i>aroE</i>        | <i>ColE1 bla lacI P<sub>T7</sub>-Bmgdh P<sub>T7</sub>-aroE</i>                                                                                                                                                                                              | This study       |
| pETDuet-Lsgdh- <i>aroE</i>        | <i>ColE1 bla lacI P<sub>T7</sub>-Tagdh P<sub>T7</sub>-aroE</i>                                                                                                                                                                                              | This study       |
| pETDuet-Bsgdh- <i>aroE</i>        | <i>ColE1 bla lacI P<sub>T7</sub>-Lsgdh P<sub>T7</sub>-aroE</i>                                                                                                                                                                                              | This study       |
| pETDuet-Bagdh- <i>aroE</i>        | <i>ColE1 bla lacI P<sub>T7</sub>-Bsgdh P<sub>T7</sub>-aroE</i>                                                                                                                                                                                              | This study       |
| pACYCDuet- <i>galP</i> - $\Delta$ | <i>ColE1 bla lacI P<sub>T7</sub>-Bagdh P<sub>T7</sub>-aroE</i>                                                                                                                                                                                              | This study       |
| pACYCDuet- <i>glf</i> - $\Delta$  | <i>p15A cat lacI P<sub>T7</sub>-galP</i>                                                                                                                                                                                                                    | This study       |
| pRSFDuet-Bmgdh- $\Delta$          | <i>p15A cat lacI P<sub>T7</sub>-glf</i>                                                                                                                                                                                                                     | This study       |
| pRSFDuet- $\Delta$ -Bmgdh         | <i>RSF1030 kan lacI P<sub>T7</sub>-Bmgdh</i>                                                                                                                                                                                                                | This study       |
| pRSFDuet- <i>aroE</i> - $\Delta$  | <i>RSF1030 kan lacI P<sub>T7</sub>-Bmgdh</i>                                                                                                                                                                                                                | This study       |
| pRSFDuet- $\Delta$ - <i>aroE</i>  | <i>RSF1030 kan lacI P<sub>T7</sub>-aroE</i>                                                                                                                                                                                                                 | This study       |
| pRSFDuet- <i>aroE</i> -Bmgdh      | <i>RSF1030 kan lacI P<sub>T7</sub>-aroE</i>                                                                                                                                                                                                                 | This study       |
| pRSFDuet-Bmgdh- <i>aroE</i>       | <i>RSF1030 kan lacI P<sub>T7</sub>-aroE P<sub>T7</sub>-Bmgdh</i>                                                                                                                                                                                            | This study       |
| pRSFDuet-Bmgdh-                   | <i>RSF1030 kan lacI P<sub>T7</sub>-Bmgdh P<sub>T7</sub>-aroE</i>                                                                                                                                                                                            | This study       |
|                                   | <i>serA</i>                                                                                                                                                                                                                                                 | This study       |

**TTG:** The starting codon of the gene is replaced with TTG.

**Table S3.** Primers used in this study

| Primer name  | Primer sequence (5' to 3')        | Description      |
|--------------|-----------------------------------|------------------|
| aroE-NdeI-F  | GTCGTTGCATATGGAAACCTATGCTGTTTTTGG | Construction     |
| aroE-XhoI-R  | CAGTCTCGAGTTACGCGGACAATTCCTCCTG   | of <i>aroE</i>   |
| aroE-BamHI-F | CGCGGATCCGATGGAAACCTATGCTGTTTTTGG | expression       |
| aroE-PstI-R  | CAGTCTGCAGTTACGCGGACAATTCCTCCTG   | vector           |
| Bmgdh-NdeI-F | GTCGTTGCATATGTACAAGGATCTGGAAGG    | Construction     |
| Bmgdh-XhoI-R | CAGTCTCGAGTTAGCCGCGGCCTGCCTG      | of <i>Bmgdh</i>  |
|              |                                   | expression       |
|              |                                   | vector           |
| serA-HR-F    | GGAGGAATTGTCCGCGTAACTCGAGCCTGGCT  | Construction     |
|              | ATTGTCGATTGCTC                    | of <i>serA</i>   |
| serA-HR-R    | GCAGCGGTTTCTTTACCAGATTAGTACAGCAGA | expression       |
|              | CGGGCG                            | vector           |
| serA-N20-F   | CTGACTAGTTCTGTTGCGGAGCTGGTGATGTTT | Deletion of      |
|              | TAGAGCTAGAAATAGC                  | <i>serA</i> with |
| pTargetF-R   | ATGACTAGTATTATACCTAGGACTGAGC      | CRISPR           |
| serA-D-1F    | CCTGGCTATTGTCGATTGCTC             | method           |
| serA-D-1R    | TTACCCAATCCTGTCTTTTGAAATG         |                  |
| serA-D-2F    | TCAAAAGACAGGATTGGGTAATTCCCCTTCTCT |                  |
|              | GAAAATCAAC                        |                  |
| serA-D-2R    | GTTACAGCCCCATGCTGCC               |                  |
